# Supplementary material
Source: PubMed Central journal article supplement (PMC4965572)
Supplement: 10.1074_M116.735415_jbc.M116.735415-1.pdf [file 10.1074_M116.735415_jbc.M116.735415-1.pdf]

Table S-1

| Mass Spectrometry Ion Annotations |          |       |                  |          |       |
|-----------------------------------|----------|-------|------------------|----------|-------|
| Figure 1D Left                    |          |       | Figure 1D Right  |          |       |
| Annotation                        | Ion Mass | K71me | Annotation       | Ion Mass | K71me |
| a5                                | 598.006  |       | a11              | 1462.734 |       |
| a17                               | 2045.872 |       | a20              | 2424.704 |       |
| b8                                | 1066.25  |       | b3               | 341.807  |       |
| b10                               | 1378.103 |       | b4               | 483.942  |       |
| b11                               | 1475.142 |       | b5               | 639.89   |       |
| b12                               | 1573.218 |       | b8               | 1080.918 |       |
| b13                               | 1700.565 |       | b13              | 1714.677 |       |
| b14                               | 1757.853 |       | c2               | 230.763  |       |
| b16                               | 1973.135 |       | c7               | 941.733  |       |
| b17                               | 2074.58  |       | c17              | 2105.045 |       |
| b20                               | 2438.38  |       | c18              | 2242.017 |       |
| c2                                | 230.989  |       | c20              | 2469.389 |       |
| c3                                | 358.925  |       | c21              | 2557.104 |       |
| c4                                | 487.056  |       | c22              | 2668.924 |       |
| c7                                | 2091.397 |       | c23              | 2755.972 |       |
| c17                               | 2091.397 |       | c24              | 2899.376 | *     |
| c18                               | 2228.051 |       | y3               | 376.818  |       |
| c20                               | 2456.066 |       | y4               | 489.843  |       |
| c21                               | 2543.063 |       | y6               | 674.883  |       |
| c24                               | 2884.518 | *     | y8               | 940.85   |       |
| y1                                | 146.336  |       | y13              | 1441.42  |       |
| y3                                | 375.866  |       | y14              | 1538.768 |       |
| y4                                | 489.001  |       | y15              | 1635.712 |       |
| y8                                | 940.094  |       | y16              | 1791.815 |       |
| y14                               | 1538.294 |       | y17              | 1947.602 |       |
| y15                               | 1635.481 |       | y18              | 2103.61  |       |
| y16                               | 1791.304 |       | y19              | 2232.26  |       |
| y17                               | 1948.125 |       | y20              | 2387.675 |       |
| y18                               | 2104.376 |       | y21              | 2545.118 |       |
| y19                               | 2232.49  |       | y24              | 2970.69  |       |
| y20                               | 2388.953 |       | M+H <sup>+</sup> | 3027.712 | *     |
| y22                               | 2672.778 |       |                  |          |       |
| y23                               | 2799.973 |       |                  |          |       |
| y24                               | 2956.1   |       |                  |          |       |
| M+H <sup>+</sup>                  | 3013.764 | *     |                  |          |       |

\* ions that contain K71me

**Table S-1:** Mass annotations for ions produced by MS/MS for the indicated figures.

Table S-2

| Mass Spectrometry Ion Annotations |          |       |                  |          |       |
|-----------------------------------|----------|-------|------------------|----------|-------|
| Figure 3B                         |          |       | Figure 3D        |          |       |
| Annotation                        | Ion Mass | K71me | Annotation       | Ion Mass | K71me |
| a1                                | 129.022  |       | a1               | 59.492   |       |
| a2                                | 226.059  |       | a8               | 830.203  |       |
| a3                                | 323.011  |       | b1               | 87.782   |       |
| a4                                | 451.103  |       | b5               | 556.341  | *     |
| a5                                | 508.115  |       | b7               | 770.89   | *     |
| a6                                | 595.14   |       | b9               | 1014.543 | *     |
| a7                                | 723.253  |       | c7               | 788.592  | *     |
| a8                                | 824.378  |       | c8               | 875.437  | *     |
| a9                                | 961.359  |       | M+H <sup>+</sup> | 1032.623 | *     |
| a11                               | 1188.68  |       |                  |          |       |
| b2                                | 254.011  |       |                  |          |       |
| b4                                | 479.077  |       |                  |          |       |
| b5                                | 536.121  |       |                  |          |       |
| b6                                | 623.169  |       |                  |          |       |
| b7                                | 751.173  |       |                  |          |       |
| b8                                | 852.191  |       |                  |          |       |
| b9                                | 989.36   |       |                  |          |       |
| c4                                | 496.104  |       |                  |          |       |
| c8                                | 869.144  |       |                  |          |       |
| y2                                | 248.04   | *     |                  |          |       |
| y3                                | 361.104  | *     |                  |          |       |
| y4                                | 448.081  | *     |                  |          |       |
| y5                                | 547.128  | *     |                  |          |       |
| y6                                | 675.185  | *     |                  |          |       |
| y7                                | 812.298  | *     |                  |          |       |
| y8                                | 913.326  | *     |                  |          |       |
| y13                               | 1410.747 | *     |                  |          |       |
| y14                               | 1507.844 | *     |                  |          |       |

\* ions that contain K71me

**Table S-2:** Mass annotations for ions produced by MS/MS for the indicated figures.
